# Supplementary material for: Enhanced electrical conductivity and photoconductive properties of Sn-doped Sb2Se3 crystals
Source: Royal Society of Chemistry journal article supplement (doi:10.1039/c8tc01683f), 2018-01-01
Supplement: c8tc01683f1.pdf [file c8tc01683f1.pdf]

## Supporting Information

### Enhanced electrical conductivity and photoconductive properties of Sn-doped $\text{Sb}_2\text{Se}_3$ crystals

Shuo Chen,<sup>a,b</sup> Xvsheng Qiao,<sup>a</sup> Zhuanghao Zheng,<sup>b</sup> Michel Cathelinaud,<sup>b</sup> Hongli Ma,<sup>b</sup> Xianping Fan<sup>\*,a</sup>  
and Xianghua Zhang<sup>\*,b</sup>

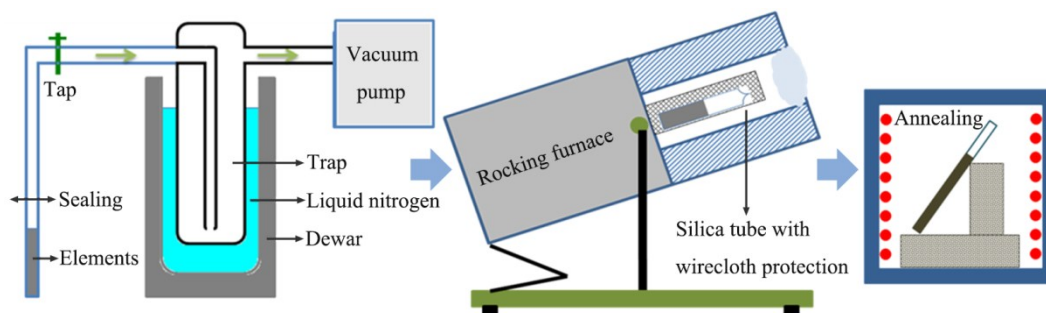

**Fig. S1** Schematic illustration of the  $(\text{Sn}_x\text{Sb}_{1-x})_2\text{Se}_3$  crystals preparation process.

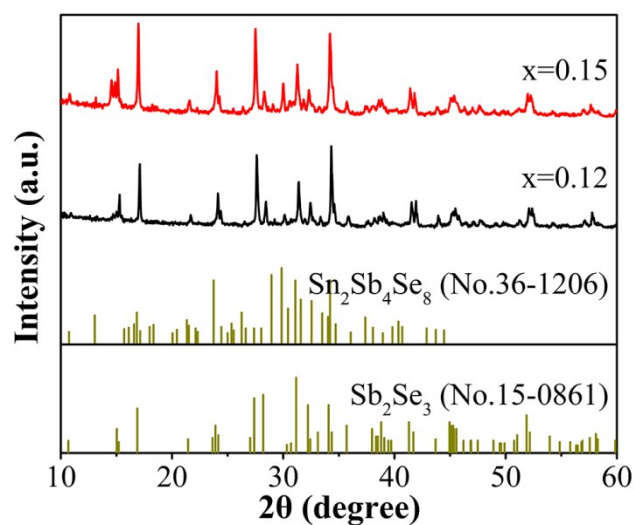

**Fig. S2** XRD patterns of the powdered  $(\text{Sn}_x\text{Sb}_{1-x})_2\text{Se}_3$  samples ( $x=0.12$  and  $0.15$ ).

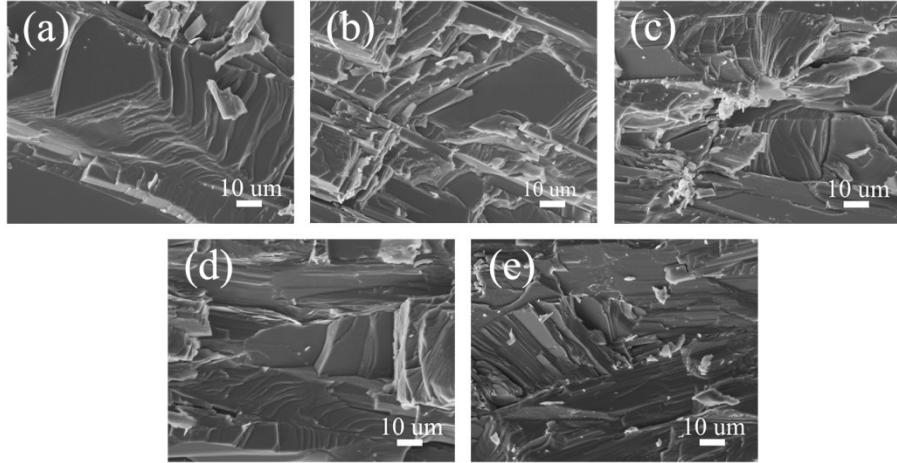

**Fig. S3** (a-e) SEM images of the fractured surface of  $(\text{Sn}_x\text{Sb}_{1-x})_2\text{Se}_3$  crystals with Sn concentration  $x$  of 0.00, 0.03, 0.05, 0.07 and 0.10, respectively.

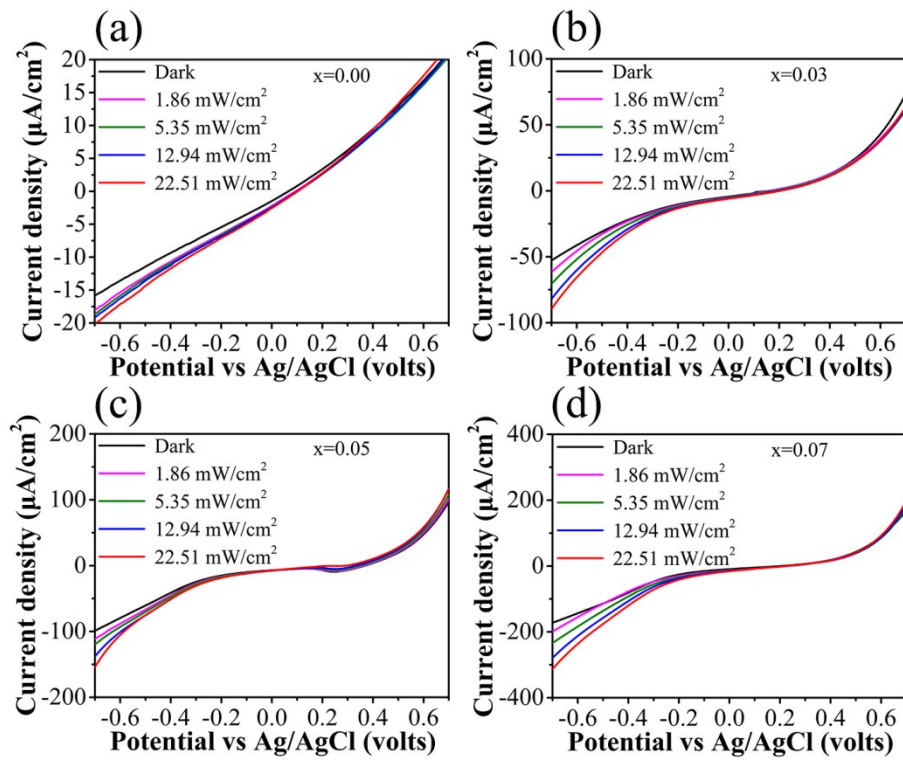

**Fig. S4** Current-voltage characteristics at different power densities of the  $(\text{Sn}_x\text{Sb}_{1-x})_2\text{Se}_3$  crystals at  $x=0.00$  (a),  $x=0.03$  (b),  $x=0.05$  (c) and  $x=0.07$  (d).
